# Supplementary material
Source: Royal Society of Chemistry journal article supplement (doi:10.1039/d5nj04950d)
Supplement: d5nj04950d1.pdf [file d5nj04950d1.pdf]

# Nanocellulose/SiO<sub>2</sub> Composite Aerogel with Improved Oil Adsorption Capacity and High Thermal Insulation Performance

Yinghui Lun<sup>1</sup>, Jie Chen<sup>1</sup>, Chengwei Kan<sup>1</sup>, Jianxin Luo<sup>1</sup>, Songtao Cai<sup>1</sup>, Chunyan

Zhang<sup>2</sup>, Hu Chen<sup>1,\*</sup>, Wenjun Li<sup>1,\*</sup>

<sup>1</sup> School of Materials Science and Engineering, Hunan Institute of Technology, Henghua Road 18, Hengyang 421002, China

<sup>2</sup> School of Chemical and Environmental Engineering, Hunan Institute of Technology, Henghua Road 18, Hengyang 421002, China

\* Corresponding author: H.C. [chenhu@hnit.edu.cn](mailto:chenhu@hnit.edu.cn); W.L. [polymer@hnu.edu.cn](mailto:polymer@hnu.edu.cn)

## Equation of active silanol preparation:

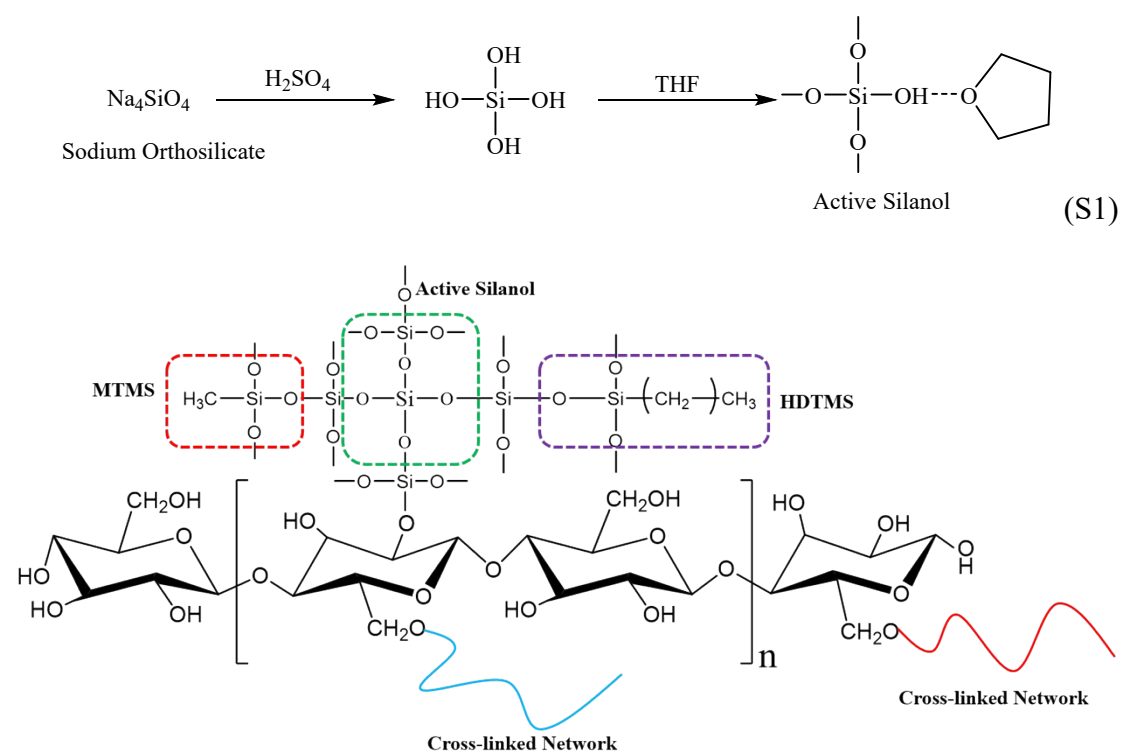

Fig. S1 Chemical equation of the nanocellulose/SiO<sub>2</sub> composite aerogel

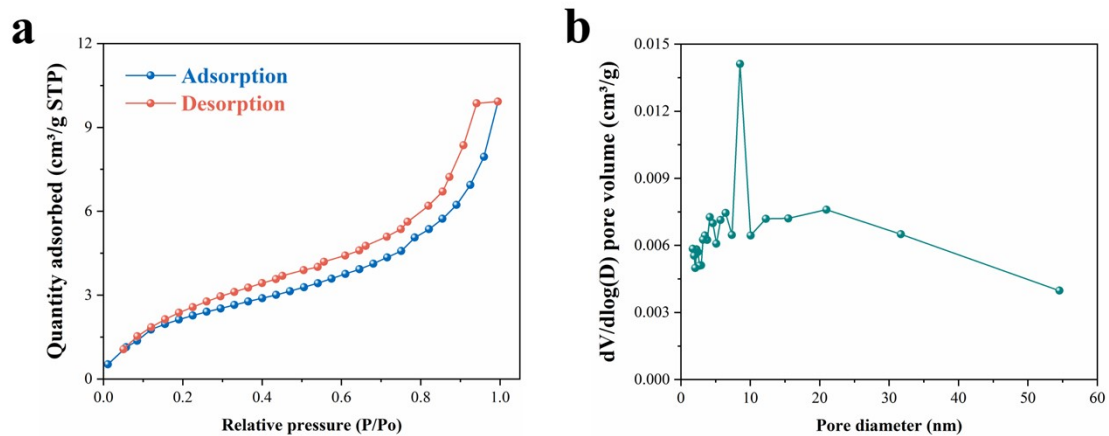

**Fig. S2** (a) N<sub>2</sub> adsorption-desorption isotherms and (b) corresponding pore size distribution of the nanocellulose/SiO<sub>2</sub> composite aerogel
